# Supplementary material for: IFN production ability and healthy ageing: mixed model analysis of a 24 year longitudinal study in Japan
Source: HighWire-hosted journal article supplement (doi:10.1136/bmjopen-2012-002113), 2013-01-01
Supplement: bmjopen-2012-002113supp_figures.pdf [file bmjopen-2012-002113supp_figures.pdf]

Supp. Figure1. Periodical IFN- $\alpha$  measurement of 33 healthy subjects.

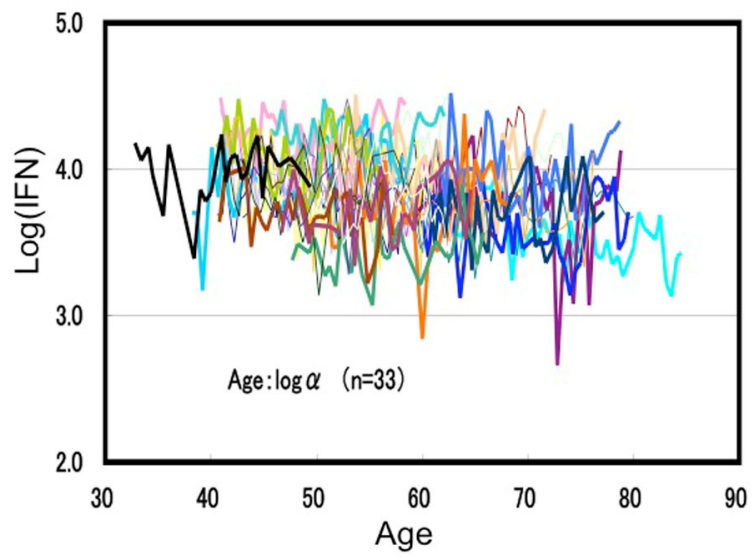

In healthy subjects log(IFN- $\alpha$ ) value fluctuate and may even undergo a severe decline. However, even after a sharp decline, IFN- $\alpha$  values had a tendency to recover if the subject was healthy.
